# Supplementary material for: Impact of discontinuation of growth hormone treatment on lipids and weight status in adolescents
Source: publisher site journal article supplement (doi:10.1515/jpem-2017-0098), 2017-01-01
Supplement: Supplementary file 1 [file jpem-2017-0098_suppl.docx]

Supplemental table 1: association (r) between changes () of lipids after the end of GH treatment and changes of BMI-SDS and IGF-1 after discontinuation of GH treatment, and the GH peak in growth hormone stimulation test in the entire cohort and in cohort of growth hormone deficient (GHD) children

|  |  total cholesterol |  LDL- cholesterol |  HDL- cholesterol |  triglycerides | atherogenic index |
| --- | --- | --- | --- | --- | --- |
| **Entire cohort** |  |  |  |  |  |
|  BMI-SDS | -0.08 | -0.11 | -0.08 | -0.01 | -0.01 |
|  IGF-1 | **0.22*** | 0.10 | 0.18* | 0.14 | -0.07 |
|  IGF-1 SDS | 0.18 | 0.12 | 0.17 | -0.06 | -0.09 |
| **GHD children** |  |  |  |  |  |
|  BMI-SDS | 0.02 | 0.05 | 0.01 | -0.18 | 0.02 |
|  IGF-1 | 0.20 | -0.01 | **0.29*** | 0.18 | -0.22 |
|  IGF-1 SDS | 0.18 | 0.15 | 0.22 | -0.06 | -0.12 |
| GH peak in GH stimulation test | **-0.39**** | **-0.53***** | +0.17 | +0.11 | **-0.40**** |

*: p<0.05; **: p<0.01; ***: p<0.001
